# Supplementary material
Source: PubMed Central journal article supplement (PMC4722809)
Supplement: NIHMS748304-supplement-Supplement1.pdf [file NIHMS748304-supplement-Supplement1.pdf]

## Supplementary Appendix

This appendix has been provided by the authors to give readers additional information about their work.

Supplement to: Burger JA, Tedeschi A, Barr PM, et al. Ibrutinib as initial therapy for patients with chronic lymphocytic leukemia. *N Engl J Med* 2015;373:2425-37. DOI: 10.1056/NEJMoa1509388

## **SUPPLEMENTARY APPENDIX**

### **TABLE OF CONTENTS:**

|                                                                            |           |
|----------------------------------------------------------------------------|-----------|
| <b>Participating Investigators and Patient Enrollment by Country .....</b> | <b>3</b>  |
| <b>Supplementary Figures S1-S2.....</b>                                    | <b>4</b>  |
| <b>Supplementary Tables S1-S8 .....</b>                                    | <b>6</b>  |
| <b>Reference .....</b>                                                     | <b>15</b> |

## Participating Investigators and Patient Enrollment by Country

Dr. Jan A. Burger, Dr. Alessandra Tedeschi, Dr. Paul M. Barr, Prof. Tadeusz Robak, Dr. Carolyn Owen, Dr. Paolo Ghia, Dr. Osnat Bairey, Prof. Peter Hillmen, Dr. Nancy L. Bartlett, Dr. Jianyong Li, Dr. David Simpson, Dr. Sebastian Grosicki, Dr. Stephen. Devereux, Dr. Helen McCarthy, Dr. Steven Coutre, Dr. Hang Quach, Prof. Gianluca Gaidano, Prof. Zvenyslava Maslyak, Dr. Don A. Stevens, Dr. Ann Janssens, Prof. Fritz Offner, Prof. Ji í Mayer, Dr. Michael O’Dwyer, Prof. Andrzej Hellmann, Dr. Anna Schuh, Dr. Tanya Siddiqi, Prof. Aaron Polliack, Dr. Constantine S. Tam, Dr. Michael Keating, Dr. Thomas J. Kipps, Dr. Jie Jen, Dr. Pavel Jindra, Dr. Martin Simkovi , Dr. Andrei Braester, Dr. Rosa Ruchlemer, Dr. Roberto Foà, Dr. Gianpietro Semenzato, Dr. Timothy Hawkins, Dr. Carolina Moreno Atanasio, Dr. Fatih Demirkan, Dr. Leylagul Kaynar, Dr. Halyna Pylypenko, Dr. Christopher Fox, Dr. Michael Thirman, Dr. Philip Campbell, Dr. Paul Coughlin, Dr. Rosemary Harrup, Dr. Bryone Kuss, Dr. Paul Turner, Dr. Ka Lung Wu, Dr. Loree Larratt, Dr. Riva Fineman, Dr. Roberto Marasca, Dr Pier Luigi Zinzani, Dr. Gillian Corbett, Dr. Pau Abrisqueta, Dr. Julio Delgado, Dr. Eva González-Barca, Dr. Jaime Pérez de Oteyza, Dr. Onder Arslan, Dr. Polina Kaplan, Dr. Hanna Oliynyk, Dr. Michael Hamblin, Dr. James Atkins, Dr. Jaqueline Barrientos, Dr. Slavisa Gasic, Dr. Jing-Zhou Hou, Dr. Edwin Kingsley, Dr. Mazyar Shadman, Dr. Xavier Badoux, Dr. Devinder Gill, Dr. Stephen Opat, Dr. Dominique Bron, Dr. Eric Van Den Neste, Dr. Hongmei Jing, Dr. Jun Zhu, Dr. Elisabeth Vandenberghe, Dr. Tamar Tadmor, Dr. Agostino Cortelezzi, Dr. Peter Ganly, Dr. Robert Weinkove, Dr. Andrzej Pluta, Dr. Alexander Pristupa, Dr. José Antonio García Marco, Dr. Filiz Vural, Dr. M nci Ya ci, Dr. Muzhdaba Kasych, Dr. Andrew Duncombe, Dr. Christopher Fegan, Dr. Robert Quackenbush, Dr. Nagendra Tirumali.

| Country        | Number of Patients Enrolled |
|----------------|-----------------------------|
| United States  | 60                          |
| United Kingdom | 30                          |
| Italy          | 27                          |
| Poland         | 20                          |
| Australia      | 18                          |
| Israel         | 16                          |
| New Zealand    | 13                          |
| Ukraine        | 13                          |
| Belgium        | 12                          |
| Spain          | 12                          |
| Canada         | 11                          |
| China          | 11                          |
| Czech Republic | 10                          |
| Turkey         | 10                          |
| Ireland        | 5                           |
| Russia         | 1                           |
| <b>Total</b>   | <b>269</b>                  |

Supplementary Figures S1-S2

Figure S1. CONSORT Diagram\*

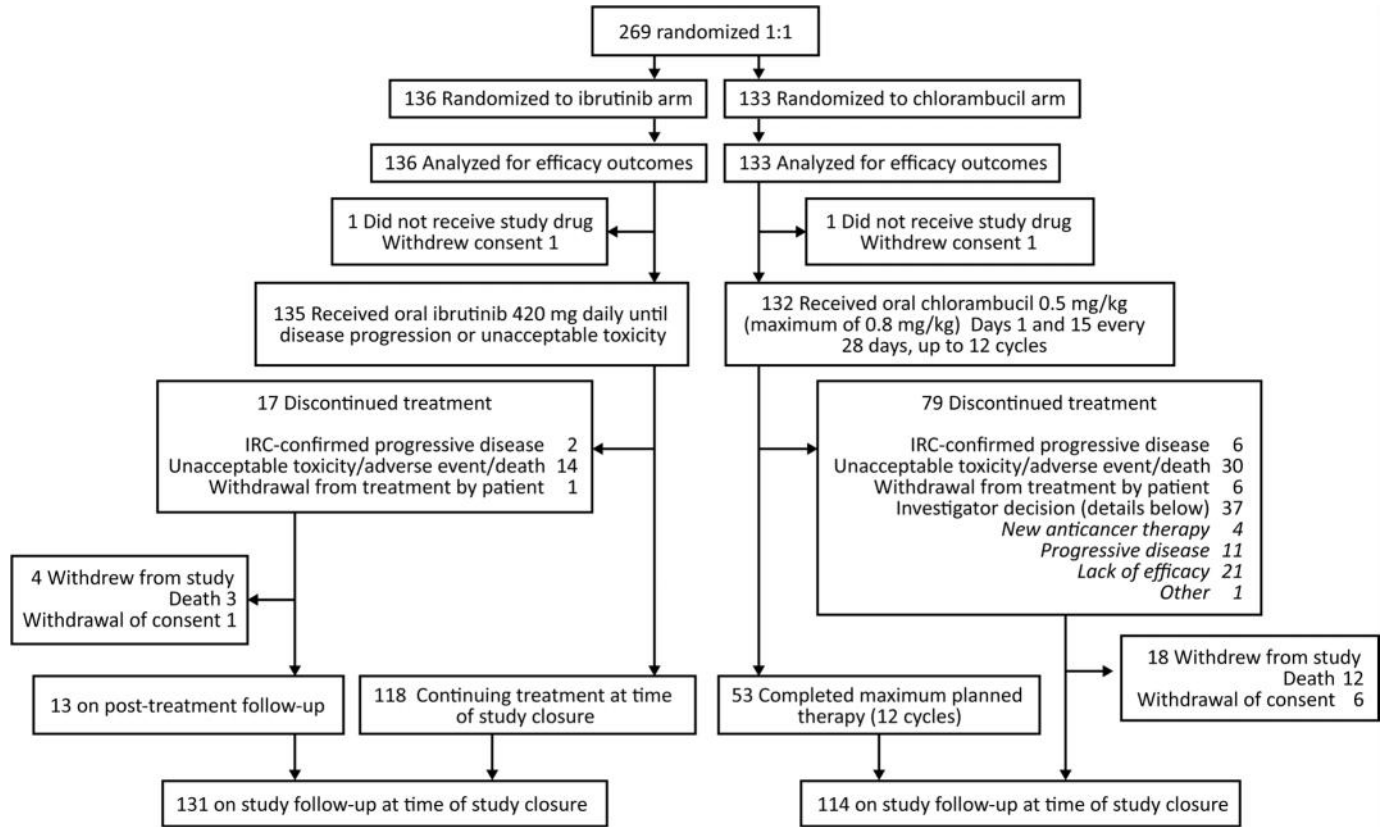

\*At the closure of this PCYC-1115-CA study (RESONATE-2™), all patients remaining on the study were transferred to the extension study, PCYC-1116-CA for long-term follow-up and ibrutinib treatment, as appropriate

**Figure S2. Systolic and Diastolic Blood Pressure Among Patients with Grade 3 or Greater Hypertension with Ibrutinib.** These graphs show systolic (Panel A) and diastolic (Panel B) blood pressure measurements over the course of study treatment in the six patients who had grade 3 or greater hypertension in the ibrutinib arm. Blood pressure measurements are plotted from baseline to 30 days after the last dose of study treatment or initiation of subsequent antitumor therapy, whichever occurred earlier.

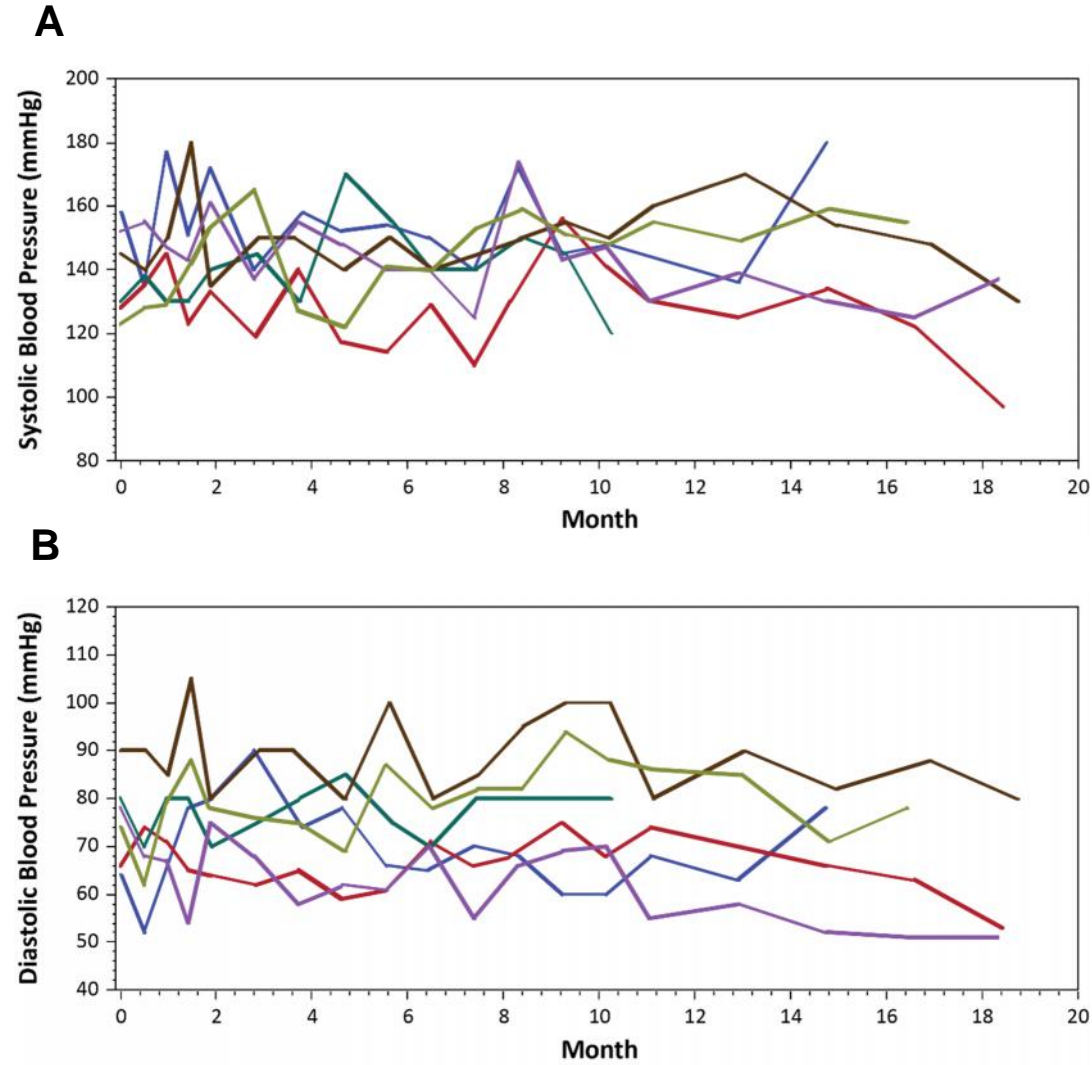

## Supplementary Tables S1-S8

**Table S1. 2008 iwCLL Indication for Treatment<sup>1</sup>**

| <b>Active disease meeting at least 1 of the following iwCLL criteria for requiring treatment<sup>1</sup></b>                                                                                                                                                                                                                                                                                                                                                                                                                                                                                                                         |
|--------------------------------------------------------------------------------------------------------------------------------------------------------------------------------------------------------------------------------------------------------------------------------------------------------------------------------------------------------------------------------------------------------------------------------------------------------------------------------------------------------------------------------------------------------------------------------------------------------------------------------------|
| <ul style="list-style-type: none"> <li>Evidence of progressive marrow failure as manifested by development of, or worsening of, anemia (hemoglobin &lt;10 g/dL) and/or thrombocytopenia (platelets &lt;100,000/<math>\mu</math>L)</li> </ul>                                                                                                                                                                                                                                                                                                                                                                                         |
| <ul style="list-style-type: none"> <li>Massive ( <math>\geq</math> 6 cm below left costal margin), progressive or symptomatic splenomegaly</li> </ul>                                                                                                                                                                                                                                                                                                                                                                                                                                                                                |
| <ul style="list-style-type: none"> <li>Massive ( <math>\geq</math> 10 cm in longest diameter), progressive or symptomatic lymphadenopathy</li> </ul>                                                                                                                                                                                                                                                                                                                                                                                                                                                                                 |
| <ul style="list-style-type: none"> <li>Progressive lymphocytosis with an increase of &gt;50% over a 2-month period or lymphocyte doubling time (LDT)* of &lt;6 months. LDT may be obtained by linear regression extrapolation of absolute lymphocyte counts obtained at intervals of 2 weeks over an observation period of 2 to 3 months.</li> </ul>                                                                                                                                                                                                                                                                                 |
| <ul style="list-style-type: none"> <li>Autoimmune hemolytic anemia and/or immune thrombocytopenic purpura that is poorly responsive to glucocorticoids or other standard therapy</li> </ul>                                                                                                                                                                                                                                                                                                                                                                                                                                          |
| <ul style="list-style-type: none"> <li>Constitutional symptoms, defined as one or more of the following disease-related symptoms or signs, documented in the patient's record prior to randomization               <ul style="list-style-type: none"> <li>– Unintentional weight loss (&gt;10% within 6 months prior to screening)</li> <li>– Significant fatigue (inability to work or perform usual activities)</li> <li>– Fever (&gt;100.5°F or 38.0°C for <math>\geq</math> 2 weeks) without evidence of infection</li> <li>– Night sweats (&gt;1 month prior to screening) without evidence of infection</li> </ul> </li> </ul> |

\* In patients with initial blood lymphocyte counts of <30,000/ $\mu$ L, LDT should not be used as a single parameter to define indication for treatment. In addition, factors contributing to lymphocytosis or lymphadenopathy other than CLL (e.g., infections) should be excluded.

**Table S2. Criteria for Response Categories**

| <b>Parameter</b>  | <b>CR</b>                                                                                                                     | <b>PR</b>                                                  | <b>PD</b>                                         |
|-------------------|-------------------------------------------------------------------------------------------------------------------------------|------------------------------------------------------------|---------------------------------------------------|
| <b>Group A</b>    |                                                                                                                               |                                                            |                                                   |
| Lymphadenopathy*  | None; 1.5 cm                                                                                                                  | Decrease 50%                                               | Increase 50%                                      |
| Hepatomegaly      | None                                                                                                                          | Decrease 50%                                               | Increase 50% or new hepatomegaly                  |
| Splenomegaly      | None                                                                                                                          | Decrease 50%                                               | Increase 50% or new splenomegaly                  |
| Blood lymphocytes | <4000/ $\mu$ L                                                                                                                | Decrease 50% from baseline.<br>Lymphocytosis defines PR-L. | Increase 50% over baseline $\ddagger$             |
| Marrow $\dagger$  | Normocellular, <30% lymphocytes, no B lymphoid nodules. Hypocellular defines CRi. Presence of B lymphoid nodules defines nPR. |                                                            |                                                   |
| <b>Group B</b>    |                                                                                                                               |                                                            |                                                   |
| Platelet count    | >100,000/ $\mu$ L                                                                                                             | >100,000/ $\mu$ L or increase 50% over baseline            | Decrease of 50% from baseline secondary to CLL    |
| Hemoglobin        | >11g/dL                                                                                                                       | >11g/dL or increase 50% over baseline                      | Decrease of >2g/dL from baseline secondary to CLL |
| Neutrophils       | >1500/ $\mu$ L                                                                                                                | >1500/ $\mu$ L or increase 50% over baseline               | N/A                                               |

\*Sum of the products of multiple lymph nodes (as evaluated by CT scans) or the longest diameter of one target lymph node.

$\dagger$ This parameter is not relevant for the PD category unless confirming cytopenic progression.

$\ddagger$ Patients with treatment-related lymphocytosis should remain on study treatment in the absence of other criteria for progressive disease. Lymphocytosis should only be considered as the sole criteria for progression if no improvement in other disease parameters.

Note: Group A defines the tumor load and Group B defines the function of the hematopoietic system.

**CR:** all of the criteria need to be met and patients have to lack disease related constitutional symptoms. Bone marrow and aspirate is required to confirm CR.

**CRi:** all of the criteria for CR need to be met, but bone marrow biopsy shows hypocellularity; patient continues to have cytopenias due to drug toxicity in the bone marrow and not due to evidence of disease.

**nPR:** all of the criteria for CR need to be met, but bone marrow biopsy shows B lymphoid nodules.

**PR:** at least 2 abnormal Group A criteria must meet be met plus one of the criteria from Group B must be met.

**PR-L:** only 1 abnormal Group A criteria met in the setting of lymphocytosis not meeting PR criteria

**SD:** absence of PD and the failure to achieve CR, CRi, nPR, PR, or PR with lymphocytosis.

**PD:** at least 1 of the above criteria from Group A or B are met or development of transformation to a more aggressive histology.



**Table S3. Summary of Patients with Unknown Causes of Death in Ibrutinib Arm**

| <b>Patient Age/Sex</b> | <b>Treatment Duration</b> | <b>Patient Narrative Surrounding Death</b>                                                                                                                                                                                                                                                  |
|------------------------|---------------------------|---------------------------------------------------------------------------------------------------------------------------------------------------------------------------------------------------------------------------------------------------------------------------------------------|
| 73 years/male          | 20 days                   | History of chronic obstructive pulmonary disease, hypertension, coronary artery disease, and type 2 diabetes mellitus. Ibrutinib treatment was ongoing at time of death. Patient experienced non-serious lobar pneumonia 8 days prior to death. Patient died at home due to unknown causes. |
| 87 years/male          | 157 days                  | History of multiple medical conditions including pulmonary embolism, pleural and pericardial effusion, and hypoxia. Ibrutinib treatment was ongoing at time of death. Patient was found to have died during sleep and cause of death was unknown.                                           |

**Table S4. Time to Response and Summary of Treatment-related Lymphocytosis with Ibrutinib**

|                                                   | <b>PCYC-1115 ibrutinib arm</b> |
|---------------------------------------------------|--------------------------------|
| Median duration of follow-up — mo                 | 18.4                           |
| Median time to initial response* (range) — mo     | 3.8 (3.2-14.8)                 |
| Patients who developed lymphocytosis† — no. (%)   | 77 (57)                        |
| Median duration of lymphocytosis‡ (range) — weeks | 12 (0.1-78)                    |
| Patients who resolved lymphocytosis‡ — no. (%)    | 73 (95)                        |

\*First response assessment was performed at the end of month 4. These data pertain to patients who responded (PR with lymphocytosis or better) to ibrutinib per IRC assessment (n=117).

†Lymphocytosis was defined as ≥50% increase from baseline and above absolute lymphocyte count of 5,000/μL.

‡Among patients who developed treatment-related lymphocytosis in the ibrutinib arm (n=77).

**Table S5. Sustained Hematologic Improvement\* in Intent-to-Treat Population**

| <b>Sustained Improvements by Laboratory Parameter</b> | <b>Ibrutinib<br/>(N = 136)</b>      | <b>Chlorambucil<br/>(N = 133)</b> | <b>P Value†</b> |
|-------------------------------------------------------|-------------------------------------|-----------------------------------|-----------------|
|                                                       | <i>number of patients (percent)</i> |                                   |                 |
| Platelet count                                        | 37 (27)                             | 15 (11)                           | <0.001          |
| Hemoglobin                                            | 62 (46)                             | 27 (20)                           | <0.001          |
| Absolute neutrophil count                             | 45 (33)                             | 14 (11)                           | <0.001          |

\*Sustained improvement was defined as hematologic improvement that was sustained continuously for at least 56 days without transfusion or growth factors, as measured by: at least 50% improvement over baseline (or for hemoglobin, improvement of 2 grams per deciliter over baseline); or improvement in baseline cytopenia to hemoglobin >11 grams per deciliter, or platelet count >100,000 cells per mm<sup>3</sup>, or absolute neutrophil count >1500 cells per mm<sup>3</sup>.

†P value based on Chi-square test.

**Table S6. Sustained Hematologic Improvement\* in Subgroup of Intent-to-Treat Patients with Baseline Cytopenia**

|                           | Baseline Cytopenia                                          |                           | Hematologic Improvement in Patients with Baseline Cytopenia           |                           |          |
|---------------------------|-------------------------------------------------------------|---------------------------|-----------------------------------------------------------------------|---------------------------|----------|
|                           | Ibrutinib<br>(N = 136)                                      | Chlorambucil<br>(N = 133) | Ibrutinib<br>(N = 136)                                                | Chlorambucil<br>(N = 133) | P Value† |
|                           | <i>number of patients with baseline cytopenia (percent)</i> |                           | <i>number of patients with improvement in each subgroup (percent)</i> |                           |          |
| Platelet count            | 35 (26)                                                     | 28 (21)                   | 27/35 (77)                                                            | 12/28 (43)                | 0.005    |
| Hemoglobin                | 51 (38)                                                     | 55 (41)                   | 43/51 (84)                                                            | 25/55 (45)                | <0.001   |
| Absolute neutrophil count | 10 (7)                                                      | 7 (5)                     | 10/10 (100)                                                           | 5/7 (71)                  | 0.07     |

\*Sustained improvement was defined as hematologic improvement that was sustained continuously for at least 56 days without transfusion or growth factors, as measured by: at least 50% improvement over baseline (or for hemoglobin, improvement of 2 grams per deciliter over baseline); or improvement in baseline cytopenia to hemoglobin >11 grams per deciliter, or platelet count >100,000 cells per mm<sup>3</sup>, or absolute neutrophil count >1500 cells per mm<sup>3</sup>.

†P value based on Chi-square test.

**Table S7. Summary of Most Common Adverse Events\***

|                                           | <b>Ibrutinib</b>                    |                     | <b>Chlorambucil</b> |                     |
|-------------------------------------------|-------------------------------------|---------------------|---------------------|---------------------|
|                                           | <b>(N = 135)</b>                    |                     | <b>(N = 132)</b>    |                     |
| Median duration of treatment (range) — mo | 17.4 (0.7-24.7)                     |                     | 7.1 (0.5-11.7)      |                     |
| <b>Adverse Event</b>                      | <b>Any Grade</b>                    | <b>Grade 3 or 4</b> | <b>Any Grade</b>    | <b>Grade 3 or 4</b> |
|                                           | <i>number of patients (percent)</i> |                     |                     |                     |
| Diarrhea                                  | 57 (42)                             | 5 (4)               | 22 (17)             | 0                   |
| Fatigue                                   | 41 (30)                             | 1 (1)               | 50 (38)             | 7 (5)               |
| Cough                                     | 30 (22)                             | 0                   | 20 (15)             | 0                   |
| Nausea                                    | 30 (22)                             | 1 (1)               | 52 (39)             | 1 (1)               |
| Anemia                                    | 25 (19)                             | 8 (6)               | 27 (20)             | 11 (8)              |
| Peripheral edema                          | 25 (19)                             | 2 (1)               | 12 (9)              | 0                   |
| Dry eye                                   | 23 (17)                             | 0                   | 6 (5)               | 0                   |
| Pyrexia                                   | 23 (17)                             | 0                   | 19 (14)             | 2 (2)               |
| Upper respiratory tract infection         | 23 (17)                             | 3 (2)               | 23 (17)             | 2 (2)               |
| Arthralgia                                | 22 (16)                             | 2 (1)               | 9 (7)               | 1 (1)               |
| Constipation                              | 21 (16)                             | 1 (1)               | 21 (16)             | 0                   |
| Neutropenia                               | 21 (16)                             | 14 (10)             | 30 (23)             | 24 (18)             |
| Vomiting                                  | 18 (13)                             | 0                   | 27 (20)             | 1 (1)               |

\*This table summarizes adverse events that occurred in at least 15% of patients in either treatment arm.

**Table S8. Summary of Major Bleeding Events in the Ibrutinib Arm**

| <b>Patient Age/Sex</b> | <b>Preferred Term (severity grade)</b>                     | <b>Time of Onset</b> | <b>Relevant Medical History and Potential Confounding Factor(s)</b>                                                                                |
|------------------------|------------------------------------------------------------|----------------------|----------------------------------------------------------------------------------------------------------------------------------------------------|
| 67 years/female        | Cerebral hemorrhage (grade 4)                              | Day 254              | Diabetes, thrombocytopenia, concurrent use of aspirin, hemorrhagic transformation of ischemic stroke                                               |
| 75 years/male          | Post-procedural hemorrhage (grade 3)                       | Day 244              | Anemia, thrombocytopenia at the time of the event, excision of colonic adenoma, dalteparin for deep vein thrombosis prophylaxis                    |
| 71 years/male          | Vitreous hemorrhage (grade 3)                              | Day 310              | Previous history of posterior retinal detachment with retina rupture, glaucoma                                                                     |
| 85 years/male          | Hyphema (grade 2)                                          | Day 155              | Bilateral cataracts, and lens insertion                                                                                                            |
| 71 years/male          | Traumatic hematoma (grade 3)                               | Day 24               | Hematoma observed at the point of pacemaker insertion (insertion on Day -29) in left chest wall, concomitant use of tocopherol acetate (vitamin E) |
| 84 years/female        | Subarachnoid hemorrhage, subdural hematoma (grade 3, both) | Day 446              | Advanced age, history of immune thrombocytopenia purpura, hemorrhage was secondary to trauma sustained by fall                                     |

## Reference

1. Hallek M, Cheson BD, Catovsky D, et al. Guidelines for the diagnosis and treatment of chronic lymphocytic leukemia: a report from the International Workshop on Chronic Lymphocytic Leukemia updating the National Cancer Institute-Working Group 1996 guidelines. *Blood* 2008;111:5446-56.
